# Supplementary material
Source: Research Square preprint supplement (doi:10.21203/rs.3.rs-9768783/v1)

| <b>Gene Name</b> | <b>F-primer</b>         | <b>R-primer</b>          |
|------------------|-------------------------|--------------------------|
| PRPS2            | GCCATACGCCCCGACAAGATA   | GTCACAAACACAATTCCGCAA    |
| IL-6             | ACTCACCTCTTCAGAACGAATTG | CCATCTTTGGAAGGTTTCAGGTTG |
| TNF- $\alpha$    | CCTCTCTCTAATCAGCCCCTCTG | GAGGACCTGGGAGTAGATGAG    |
| MMP13            | GACTATGCGTGGCTGGATAGC   | GCATCTGGAGTAACCGTATTG    |
| COL2A1           | TGGACGATCAGGCGAAACC     | GCTGCGGATGCTCTCAATCT     |
| GAPDH            | GGAGCGAGATCCCTCCAAAAT   | GGCTGTTGTCATACTTCTCATGG  |

Table S1. Primer information involved in the text

Figure 6G

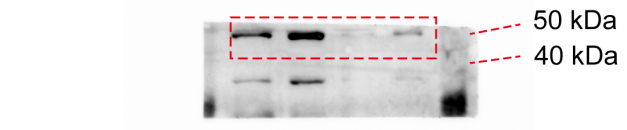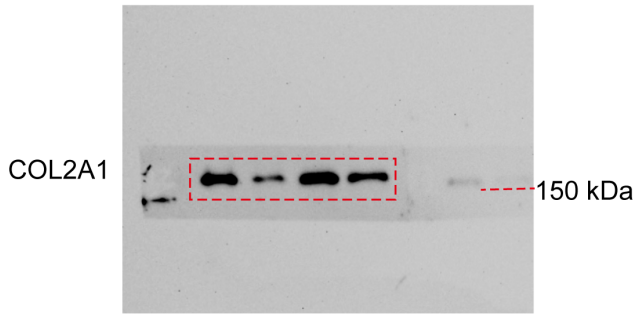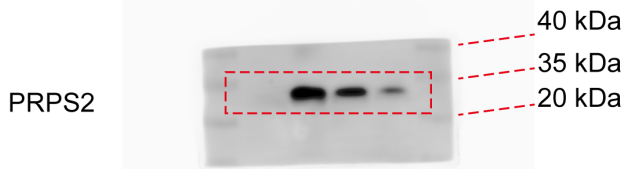

p-p65

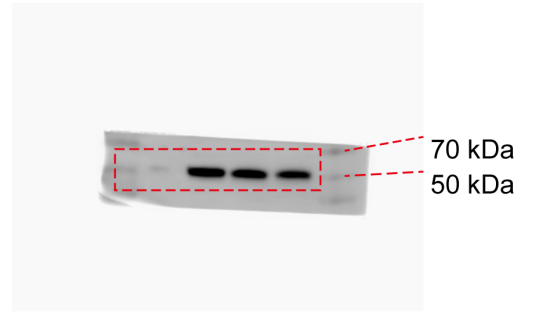

Total-p65

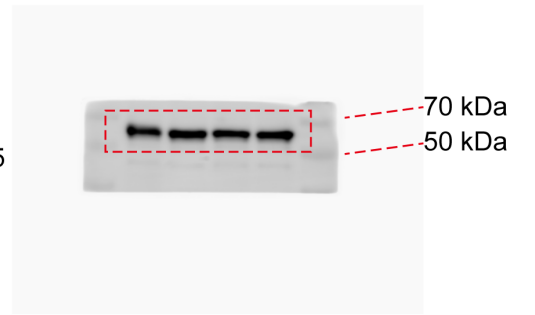

$\beta$ -actin

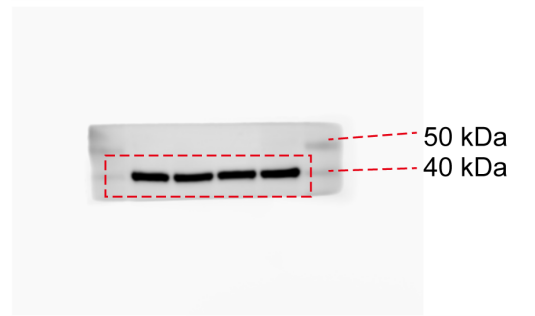

Figure 7C

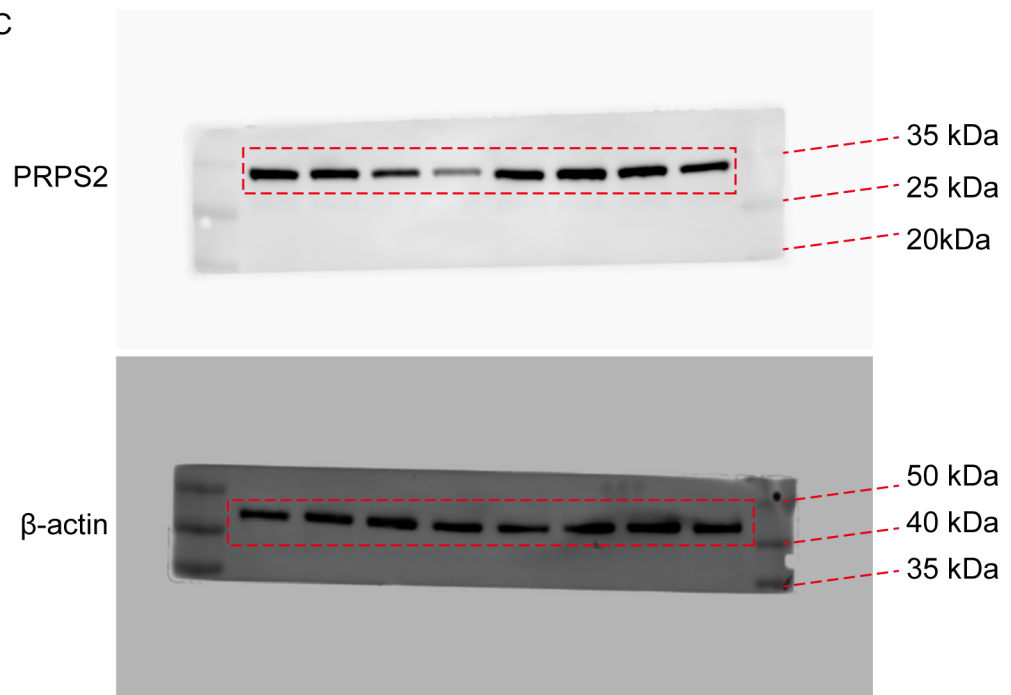

Figure 7D Figure 6C

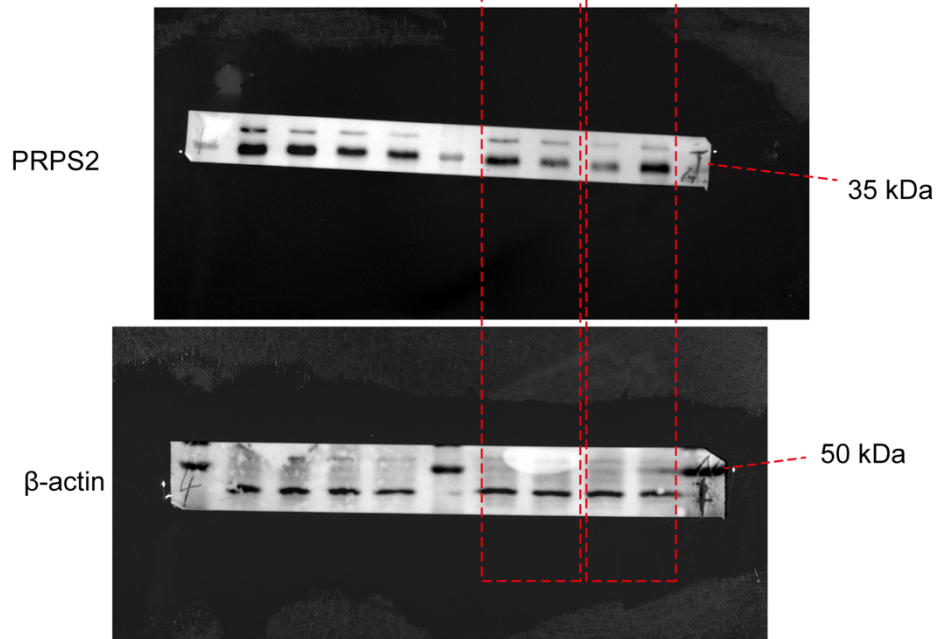

Figure 7F

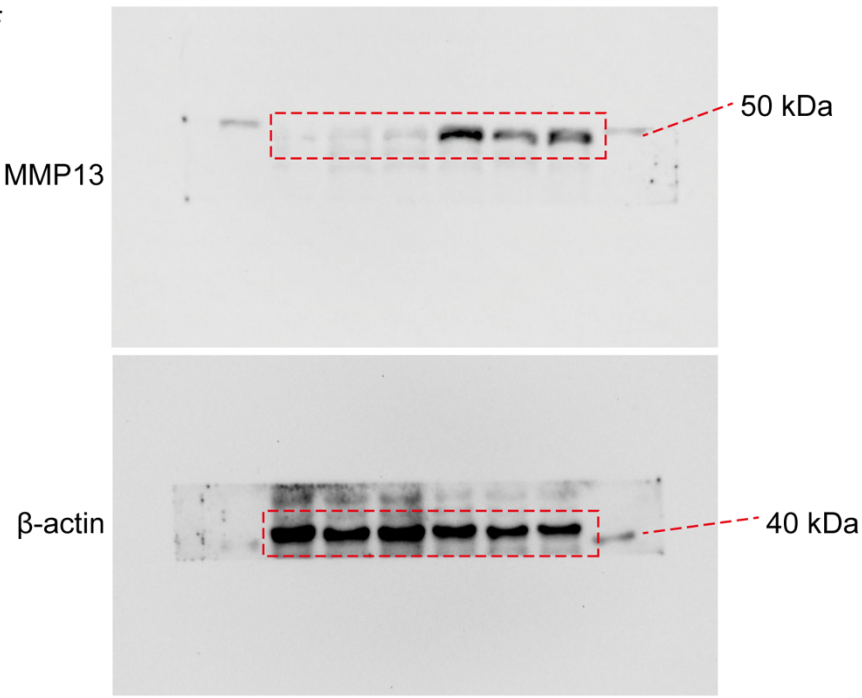

Supplement: Supplementary file 1 [file da5c3e7cab5806d2156177c1.pdf]
